# Supplementary material
Source: PubMed Central journal article supplement (PMC6323638)
Supplement: NIHMS1510443-supplement-7.pdf [file NIHMS1510443-supplement-7.pdf]

## Supplemental Data 7.

raw  $\Delta\Delta$ CT qPCR

|                         | <i>Notch</i> | <i>Su(H)</i> | <i>sca</i>  | <i>Dop2R</i> |
|-------------------------|--------------|--------------|-------------|--------------|
| <i>elav-Gal4 / + A</i>  | 0.886065789  | 0.306896026  | 0.510028307 | 0.377892414  |
| <i>elav-Gal4 / + B</i>  | 0.637971952  | 0.380632284  | 0.400293334 | 0.296091883  |
| <i>elav-Gal4 / + C</i>  | 0.778789647  | 0.43474069   | 0.481866601 | 0.377740566  |
| <i>elav-Gal4 / + D</i>  | 0.89637544   | 0.464933264  | 0.613881799 | 0.453123438  |
| <i>UAS-RNAi / + A</i>   | 1.078866712  | 0.758133925  | 1.232800934 | 0.716470463  |
| <i>UAS-RNAi / + B</i>   | 0.858729608  | 1.108311055  | 0.816108988 | 1.056669422  |
| <i>UAS-RNAi / + C</i>   | 1.2605535    | 1.106656538  | 1.192641775 | 0.822665116  |
| <i>UAS-RNAi / + D</i>   | 0.80185018   | 1.026898482  | 0.758448303 | 1.404194998  |
| <i>elav &gt; RNAi A</i> | 0.404990392  | 0.147721453  | 0.644299605 | 0.201300521  |
| <i>elav &gt; RNAi B</i> | 0.293381685  | 0.175069051  | 0.280649316 | 0.218741623  |
| <i>elav &gt; RNAi C</i> | 0.348479464  | 0.285788843  | 0.403076593 | 0.390768832  |
| <i>elav &gt; RNAi D</i> | 0.452533582  | 0.279148931  | 0.522512168 | 0.303622127  |
