# Supplementary material
Source: PubMed Central journal article supplement (PMC6323638)

Supplemental Data 1.

Blot:  $\alpha$ Notch

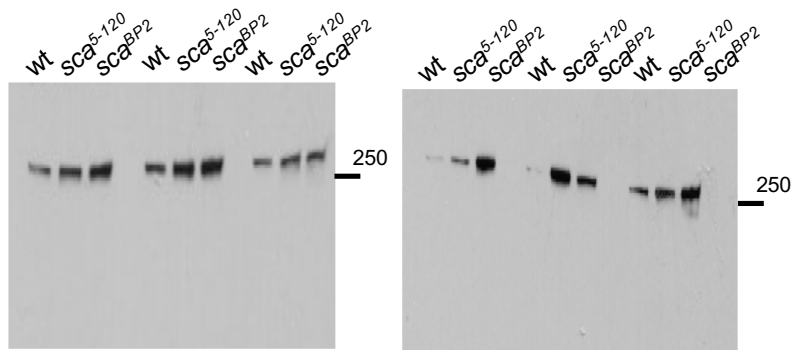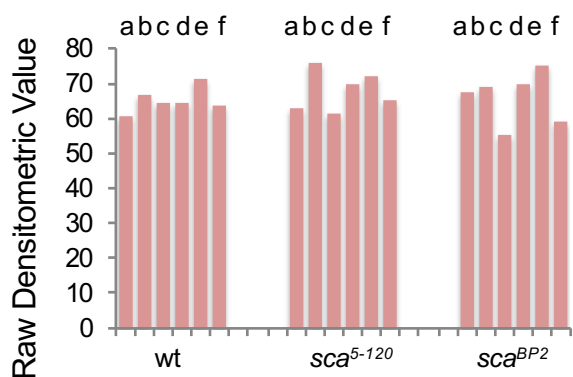

Total Protein

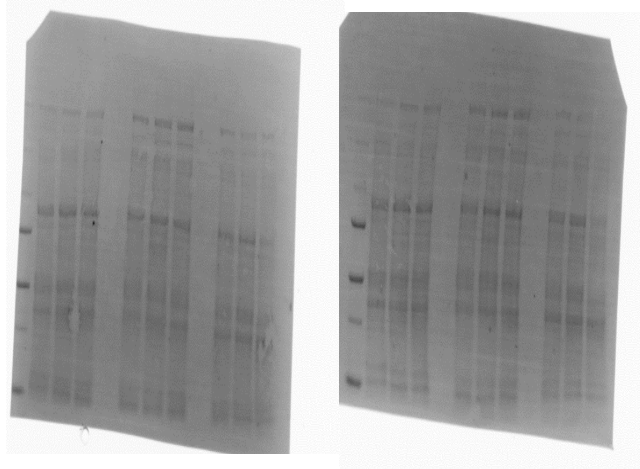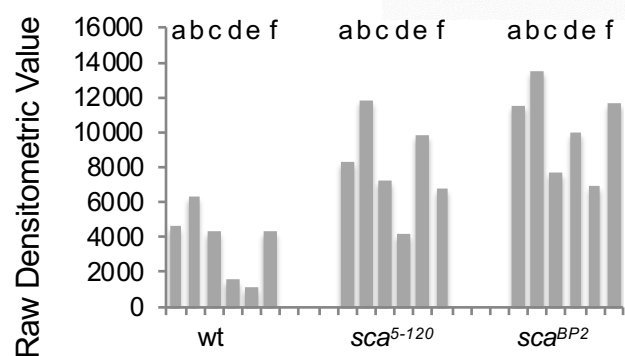

Blot:  $\alpha$ Delta

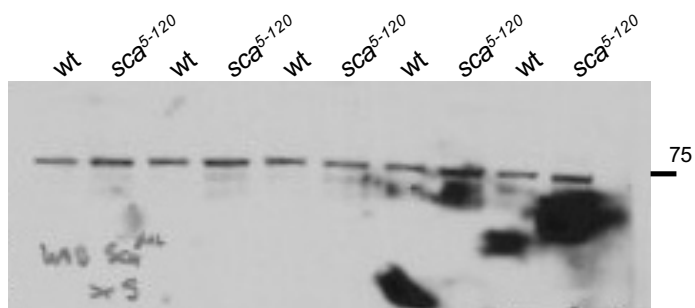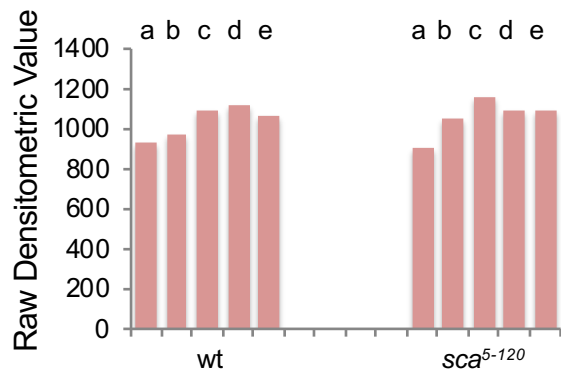

Total Protein

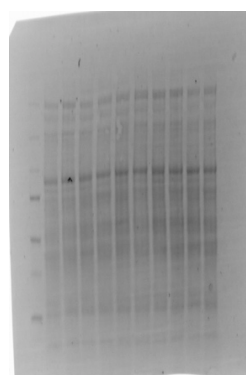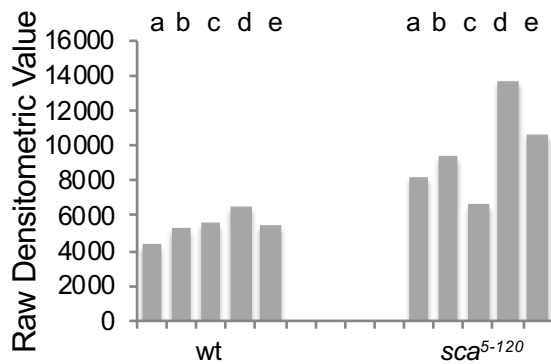

Supplement: NIHMS1510443-supplement-1.pdf [file NIHMS1510443-supplement-1.pdf]

Supplemental Data 2.

Blot:  $\alpha$ Notch

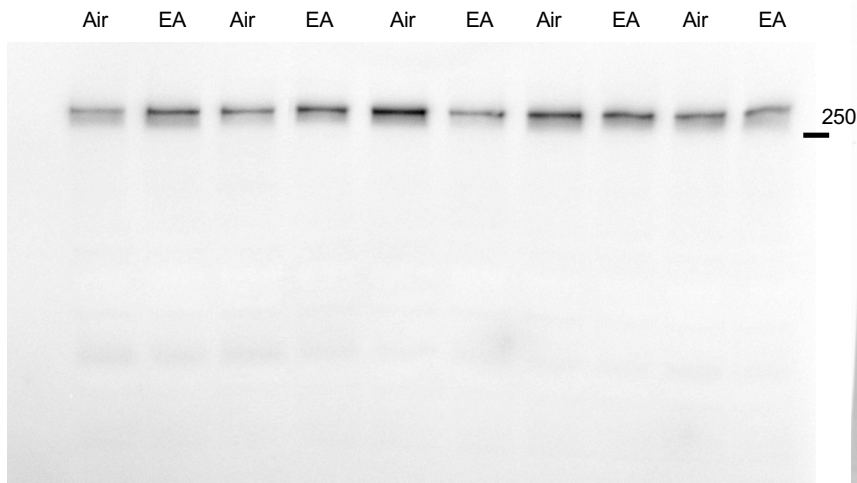

Total Protein

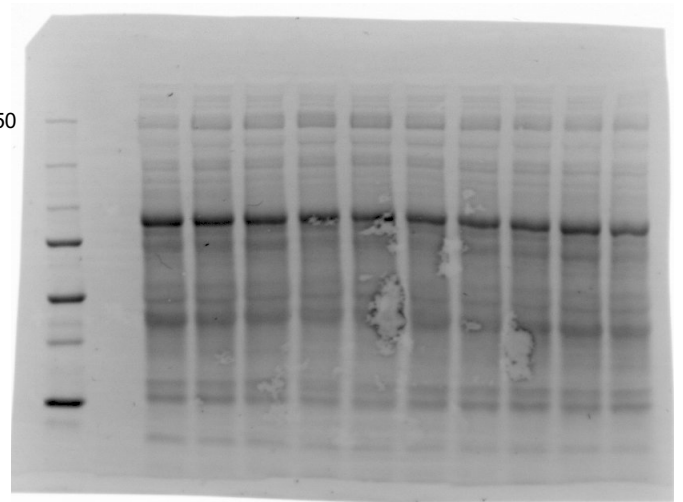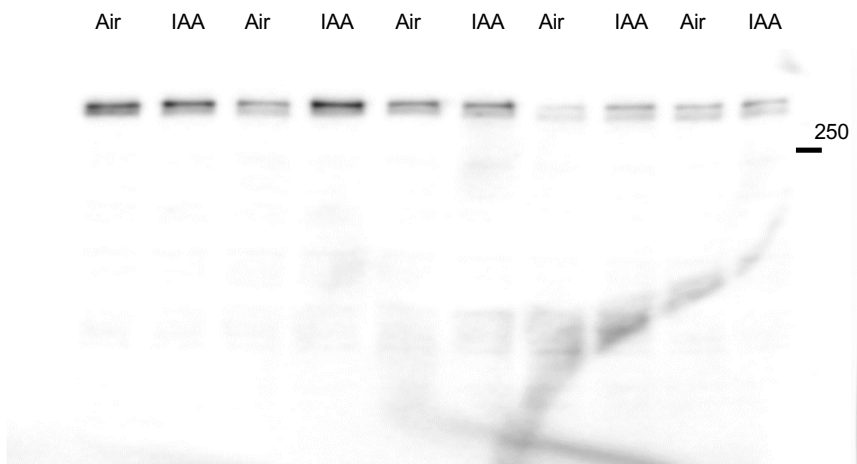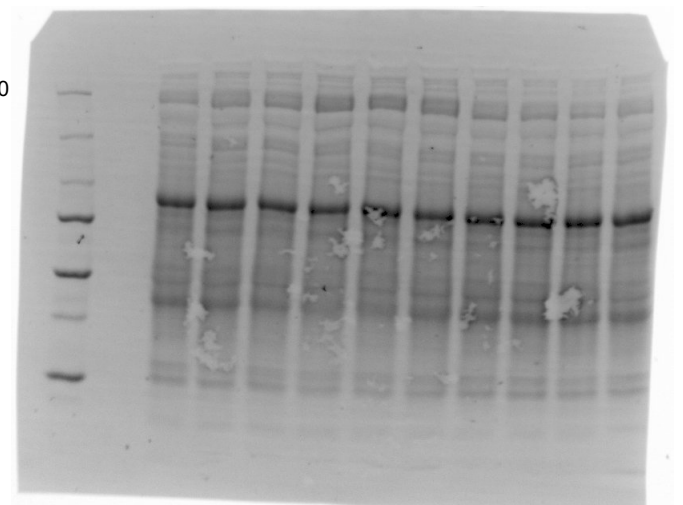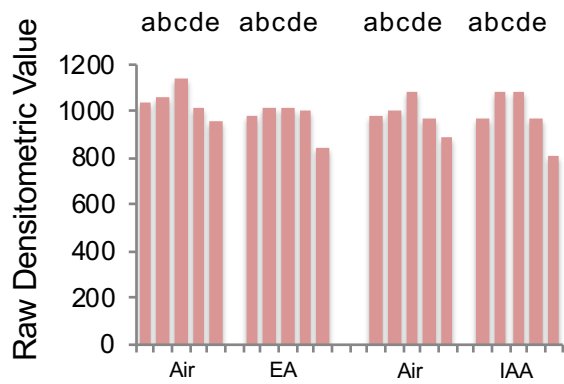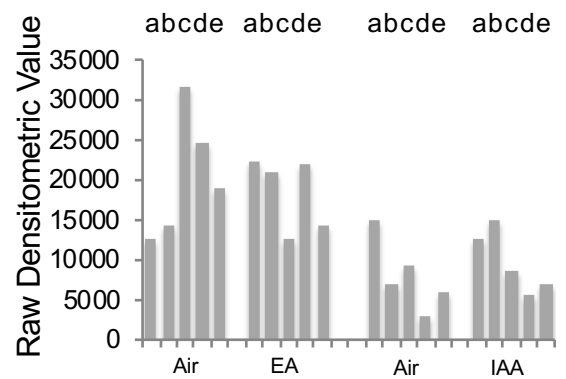

Supplement: NIHMS1510443-supplement-2.pdf [file NIHMS1510443-supplement-2.pdf]

Supplemental Data 4.

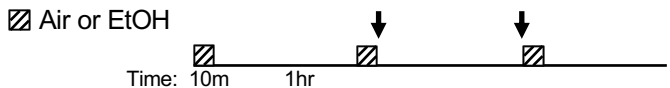

Blot:  $\alpha$ Notch

Total Protein

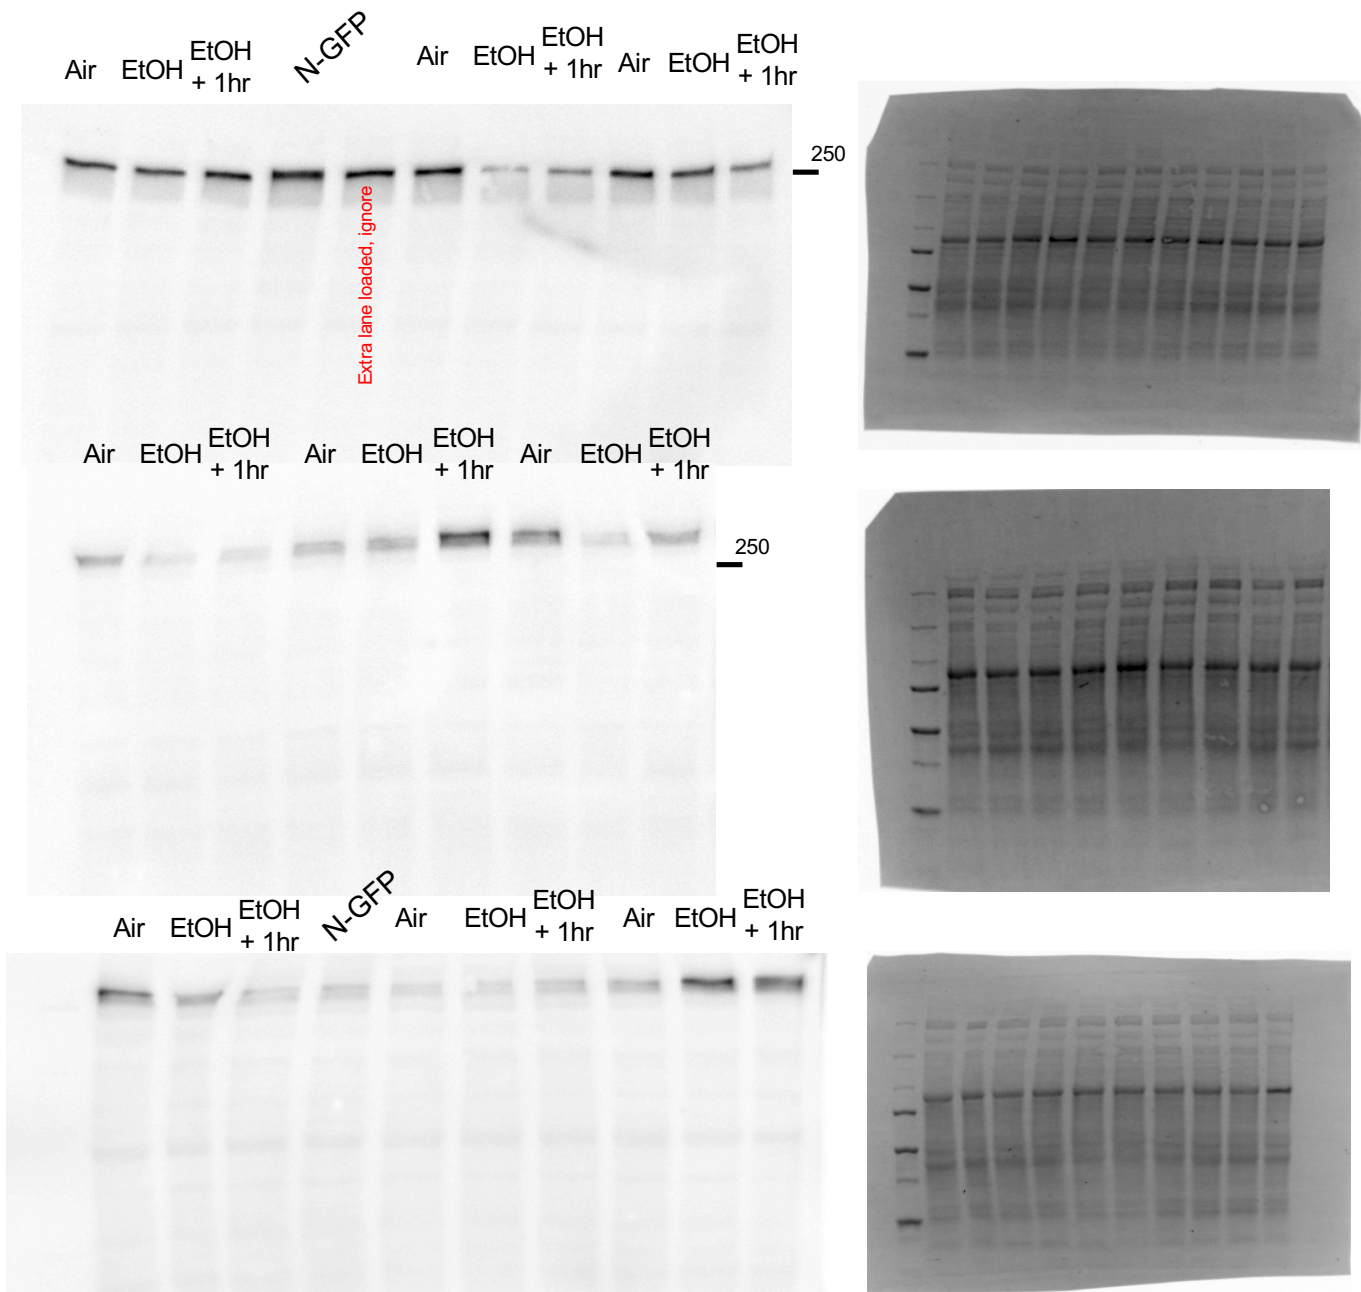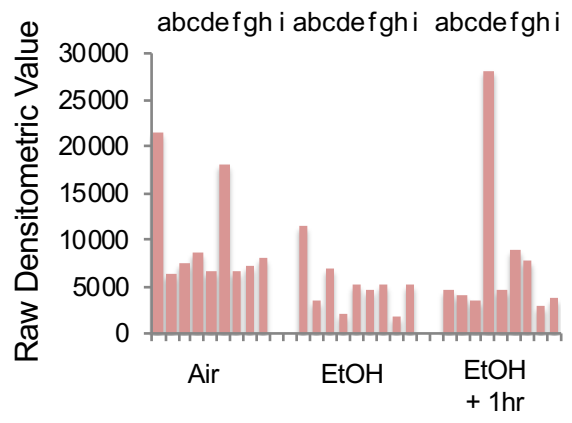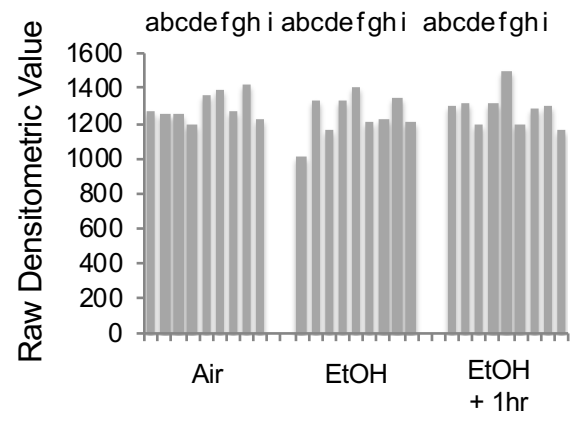

Supplement: NIHMS1510443-supplement-4.pdf [file NIHMS1510443-supplement-4.pdf]

Supplemental Data 5.

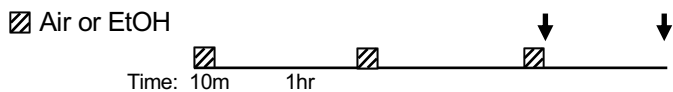

Blot:  $\alpha$ Notch

Total Protein

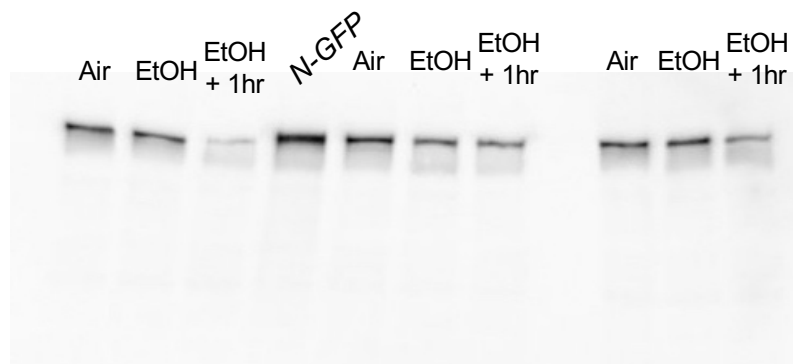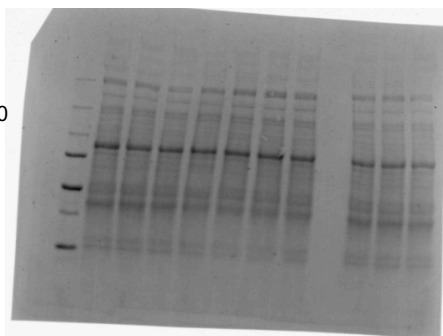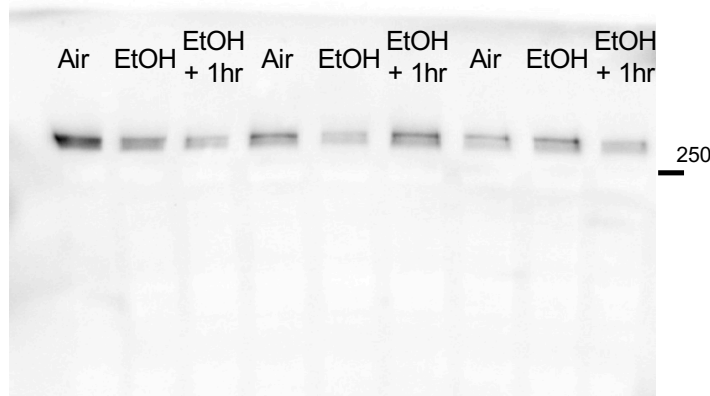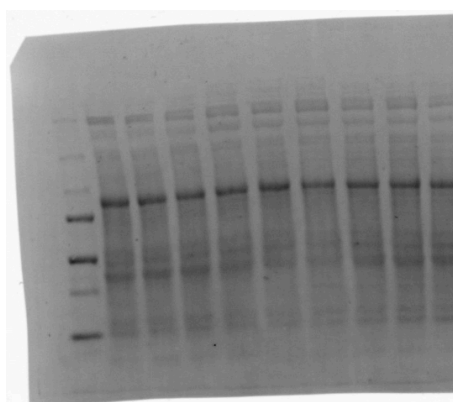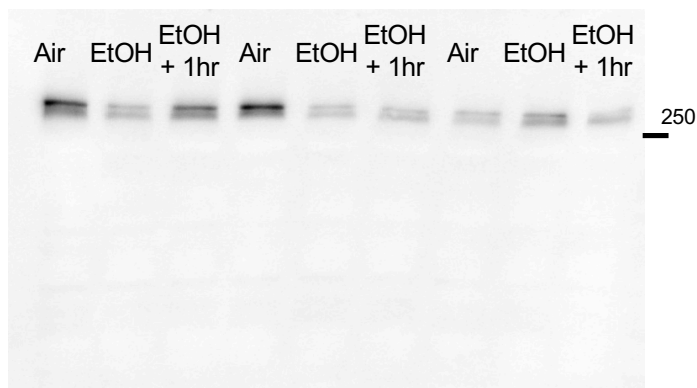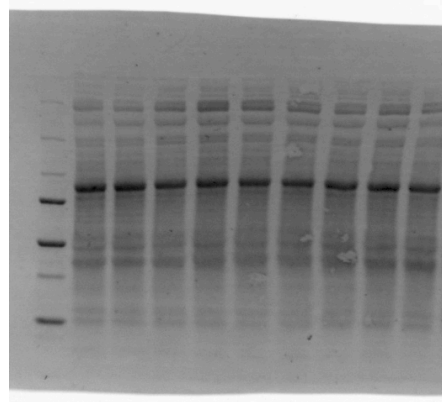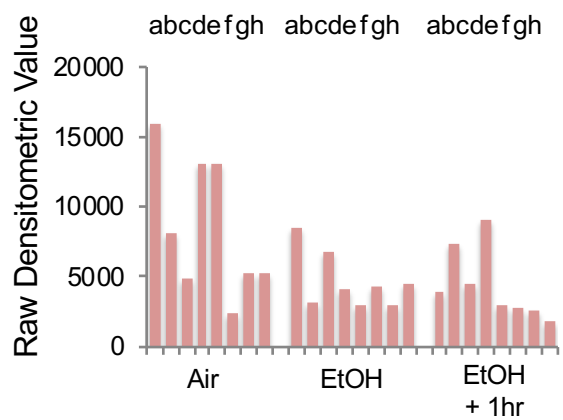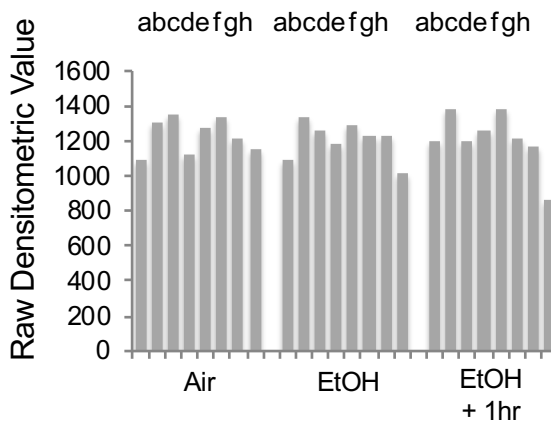

Supplement: NIHMS1510443-supplement-5.pdf [file NIHMS1510443-supplement-5.pdf]
